# Supplementary material
Source: PubMed Central journal article supplement (PMC3717185)
Supplement: 97320630009572S1.pdf [file 97320630009572S1.pdf]

## Supplementary material:

**Table 1:** Various parameters computed using ExPASy's ProtParam tool of AGPase in selected plants

| Protein          | Accession no | Length | Molecular weight | pI   | -R | +R | EC    | II    | AI    | Gravy  |
|------------------|--------------|--------|------------------|------|----|----|-------|-------|-------|--------|
| Wheat (LS)       | P12299       | 522    | 57808.7          | 6.12 | 65 | 60 | 45435 | 42.86 | 80.52 | -0.253 |
| Wheat (SS)       | P30523       | 473    | 52147.4          | 5.54 | 62 | 50 | 46550 | 35.91 | 90.76 | -0.226 |
| Rice(LS)         | Q688T8       | 519    | 57653.7          | 6.34 | 63 | 59 | 44070 | 35.72 | 82.85 | -0.212 |
| Rice (SS)        | P15280       | 514    | 56104.0          | 6.58 | 59 | 57 | 46675 | 42.56 | 90.37 | -0.159 |
| Maize (LS)       | P55241       | 516    | 57071.0          | 6.16 | 60 | 55 | 44195 | 38.88 | 85.06 | -0.207 |
| Maize (SS)       | Q947C0       | 475    | 52197.7          | 5.46 | 59 | 50 | 52050 | 33.35 | 91.87 | -0.164 |
| Barley (LS)      | P30524       | 523    | 57932.6          | 6.17 | 65 | 60 | 45560 | 43.13 | 80.75 | -0.242 |
| Barley (SS)      | P55238       | 513    | 56049.2          | 6.11 | 60 | 55 | 46675 | 36.52 | 91.72 | -0.118 |
| Potato (LS)      | P55243       | 483    | 53602.3          | 8.92 | 55 | 62 | 46090 | 36.44 | 88.03 | -0.214 |
| Potato (SS)      | P23509       | 521    | 57240.3          | 6.73 | 61 | 60 | 46675 | 44.18 | 91.21 | -0.196 |
| Arabidopsis (LS) | P55229       | 522    | 57673.8          | 8.02 | 61 | 63 | 47705 | 42.22 | 92.87 | -0.174 |
| Arabidopsis (SS) | P55228       | 520    | 56650.5          | 6.13 | 59 | 55 | 46675 | 34.86 | 93.04 | -0.131 |

PI- isoelectric point; R- number of negatively & positively charged residue; EC- extinction coefficient; II-instability index; AI- aliphatic index, Gravy-Grand average of hydrophaticity

**Table 2:** Secondary structure prediction of AGPase through SOPMA

| Protein          | $\alpha$<br>Helix | $\beta_{10}$<br>Helix | Pi<br>Helix | $\beta$<br>Bridge | Extended<br>Strand | $\beta$<br>Turn | Bend<br>Region | Random<br>Coil | Ambiguous<br>States | Other<br>States |
|------------------|-------------------|-----------------------|-------------|-------------------|--------------------|-----------------|----------------|----------------|---------------------|-----------------|
| Wheat(LS)        | 24.33             | 0.00                  | 0.00        | 0.00              | 22.03              | 7.28            | 0.00           | 46.36          | 0.00                | 0.00            |
| Wheat(SS)        | 22.62             | 0.00                  | 0.00        | 0.00              | 22.41              | 6.77            | 0.00           | 48.20          | 0.00                | 0.00            |
| Rice(LS)         | 25.24             | 0.00                  | 0.00        | 0.00              | 21.97              | 6.55            | 0.00           | 46.24          | 0.00                | 0.00            |
| Rice (SS)        | 25.29             | 0.00                  | 0.00        | 0.00              | 22.18              | 7.20            | 0.00           | 45.33          | 0.00                | 0.00            |
| Maize (LS)       | 25.58             | 0.00                  | 0.00        | 0.00              | 22.48              | 7.56            | 0.00           | 44.38          | 0.00                | 0.00            |
| Maize (SS)       | 22.95             | 0.00                  | 0.00        | 0.00              | 23.37              | 6.32            | 0.00           | 47.37          | 0.00                | 0.00            |
| Barley (LS)      | 24.09             | 0.00                  | 0.00        | 0.00              | 22.56              | 7.27            | 0.00           | 46.08          | 0.00                | 0.00            |
| Barley (SS)      | 25.93             | 0.00                  | 0.00        | 0.00              | 22.61              | 6.63            | 0.00           | 44.83          | 0.00                | 0.00            |
| Potato(LS)       | 24.84             | 0.00                  | 0.00        | 0.00              | 24.02              | 7.04            | 0.00           | 44.10          | 0.00                | 0.00            |
| Potato(SS)       | 24.57             | 0.00                  | 0.00        | 0.00              | 22.46              | 5.37            | 0.00           | 47.60          | 0.00                | 0.00            |
| Arabidopsis(LS)  | 24.71             | 0.00                  | 0.00        | 0.00              | 23.18              | 6.90            | 0.00           | 45.21          | 0.00                | 0.00            |
| Arabidopsis (SS) | 25.00             | 0.00                  | 0.00        | 0.00              | 24.81              | 6.54            | 0.00           | 43.65          | 0.00                | 0.00            |

**Table 3:** Motif prediction of AGPase in selected plants

| Protein     | Motif ID | Motif description    | Start | End | Pattern              |
|-------------|----------|----------------------|-------|-----|----------------------|
| Wheat (LS)  | PS00808  | ADP_GLC_PYROPHOSPH_1 | 96    | 115 | GGGtGTqLfpLTstrAtPAV |
|             | PS00809  | ADP_GLC_PYROPHOSPH_2 | 185   | 193 | WFrGTADAV            |
|             | PS00810  | ADP_GLC_PYROPHOSPH_3 | 301   | 311 | ASMGVYVFkrD          |
| Wheat (SS)  | PS00808  | ADP_GLC_PYROPHOSPH_1 | 49    | 68  | GGGaGTrLypLTtkrAkPAV |
|             | PS00809  | ADP_GLC_PYROPHOSPH_2 | 138   | 146 | WFqGTADAV            |
|             | PS00810  | ADP_GLC_PYROPHOSPH_3 | 250   | 260 | ASMGIVYVIskH         |
| Rice (LS)   | PS00808  | ADP_GLC_PYROPHOSPH_1 | 93    | 112 | GGGtGTqLfpLTstrAtPAV |
|             | PS00809  | ADP_GLC_PYROPHOSPH_2 | 182   | 190 | WFqGTADAV            |
|             | PS00810  | ADP_GLC_PYROPHOSPH_3 | 298   | 308 | ASMGVYVFkrD          |
| Rice (SS)   | PS00808  | ADP_GLC_PYROPHOSPH_1 | 90    | 109 | GGGaGTrLypLTtkrAkPAV |
|             | PS00809  | ADP_GLC_PYROPHOSPH_2 | 179   | 187 | WFqGTADAV            |
|             | PS00810  | ADP_GLC_PYROPHOSPH_3 | 291   | 301 | ASMGIVYVIskN         |
| Maize (LS)  | PS00808  | ADP_GLC_PYROPHOSPH_1 | 90    | 109 | GGGtGSqLfpLTstrAtPAV |
|             | PS00809  | ADP_GLC_PYROPHOSPH_2 | 179   | 187 | WFqGTADSI            |
|             | PS00810  | ADP_GLC_PYROPHOSPH_3 | 295   | 305 | ASMGIVYVfkd          |
| Maize (SS)  | PS00808  | ADP_GLC_PYROPHOSPH_1 | 51    | 70  | GGGaGTrLypLTtkrAkPAV |
|             | PS00809  | ADP_GLC_PYROPHOSPH_2 | 140   | 148 | WFqGTADAV            |
|             | PS00810  | ADP_GLC_PYROPHOSPH_3 | 252   | 262 | ASMGIVYVfskD         |
| Barley (LS) | PS00808  | ADP_GLC_PYROPHOSPH_1 | 97    | 116 | GGGtGTqLfpLTstrAtPAV |
|             | PS00809  | ADP_GLC_PYROPHOSPH_2 | 186   | 194 | WFrGTADAV            |
|             | PS00810  | ADP_GLC_PYROPHOSPH_3 | 302   | 312 | ASMGVYVFkrD          |

|             |         |                      |     |     |                                |
|-------------|---------|----------------------|-----|-----|--------------------------------|
|             | PS00808 | ADP_GLC_PYROPHOSPH_1 | 89  | 108 | GGGaGTrLypLTkkrAkPAV           |
| Barley      | PS00809 | ADP_GLC_PYROPHOSPH_2 | 178 | 186 | WFqGTADAV                      |
| (SS)        | PS00810 | ADP_GLC_PYROPHOSPH_3 | 290 | 300 | ASMGIVVIskH                    |
|             | PS00808 | ADP_GLC_PYROPHOSPH_1 | 55  | 74  | GGGaGTrLfpLTkkrAkPAV WFqGTAHAV |
| Potato      | PS00809 | ADP_GLC_PYROPHOSPH_2 | 146 | 154 |                                |
| (LS)        |         |                      |     |     |                                |
| Potato      | PS00808 | ADP_GLC_PYROPHOSPH_1 | 97  | 116 | GGGaGTrLypLTkkrAkPAV           |
| (SS)        | PS00809 | ADP_GLC_PYROPHOSPH_2 | 186 | 194 | WFqGTADAV                      |
|             | PS00810 | ADP_GLC_PYROPHOSPH_3 | 298 | 308 | ASMGIVVIskD                    |
| Arabidopsis | PS00808 | ADP_GLC_PYROPHOSPH_1 | 96  | 115 | GGGaGTrLfpLTkkrAkPAV           |
| (LS)        | PS00809 | ADP_GLC_PYROPHOSPH_2 | 186 | 194 | WFqGTADAV                      |
|             | PS00810 | ADP_GLC_PYROPHOSPH_3 | 301 | 311 | ASMGVYVfkkE                    |
| Arabidopsis | PS00808 | ADP_GLC_PYROPHOSPH_1 | 96  | 115 | GGGaGTrLypLTkkrAkPAV           |
| (SS)        | PS00809 | ADP_GLC_PYROPHOSPH_2 | 185 | 193 | WFqGTADAV                      |
|             | PS00810 | ADP_GLC_PYROPHOSPH_3 | 297 | 307 | ASMGIVVsrD                     |
